# Supplementary material for: Metabolic engineering of the oleaginous yeast Yarrowia lipolytica PO1f for production of erythritol from glycerol
Source: PubMed Central journal article supplement (PMC8466642; doi:10.1186/s13068-021-02039-0), 2021-09-25
Supplement: 13068_2021_2039_MOESM10_ESM.pdf [file 13068_2021_2039_MOESM10_ESM.pdf]

**Additional File 10: Tables S1.** List of genes selected for quantitative PCR.

| Protein Name                         | ID            | Gene        | Pathway                   |
|--------------------------------------|---------------|-------------|---------------------------|
| 1 Glycerol Kinase                    | YALI1_F00654p | GK          |                           |
| 2 G-3-P dehydrogenase (FAD+)         | YALI1_B18499p | GUT2        | G3P pathway               |
| 3 G-3-P dehydrogenase (NAD+)         | YALI1_B04433p | GPD1/GPD2   |                           |
| 4 Dihydroxyacetone kinase            | YALI1_F12917p | DAK1 / DAK2 |                           |
| 5 Dihydroxyacetone kinase            | YALI1_E24532p | DAK1 / DAK2 |                           |
| 6 Glycerol Dehydrogenase (NADP+)     | YALI1_B09211p | GCY1/YPR1   | DHA pathway               |
| 7 Glycerol Dehydrogenase (NADP+)     | YALI1_B28394p | GCY1/YPR1   |                           |
| 8 Arabitol dehydrogenase             | YALI1_E15452p | ADH         |                           |
| 9 Aldose reductase (NAD(P)+)         | YALI1_D09870p | GRE3        |                           |
| 10 Aquaglyceroporin                  | YALI1_F00616p | FPS1        | Glycerol uptake           |
| 11 Aquaglyceroporin                  | YALI1_E06664p | FPS1        |                           |
| 12 Transketolase                     | YALI1_E07744p | TKL1        |                           |
| 13 Transaldolase                     | YALI1_F20914p | TAL1        | Pentose phosphate pathway |
| 14 Glucose-6-phosphate dehydrogenase | YALI1_E26811p | ZWF1        |                           |
| 15 6-phosphogluconate dehydrogenase  | YALI1_B20462p | GND1        |                           |
| 16 Actin                             | Actin 142575p | ACT         | Internal control          |
