# Supplementary material for: Metabolic engineering of the oleaginous yeast Yarrowia lipolytica PO1f for production of erythritol from glycerol
Source: PubMed Central journal article supplement (PMC8466642; doi:10.1186/s13068-021-02039-0), 2021-09-25
Supplement: 13068_2021_2039_MOESM11_ESM.pdf [file 13068_2021_2039_MOESM11_ESM.pdf]

**Additional File 11: Table S2.** Oligonucleotides used in this study for qPCR.

| <b>Sr. no.</b> | <b>Primer</b>                 | <b>Sequence</b>               |
|----------------|-------------------------------|-------------------------------|
| 1              | jgi YarliW29_1 6368 FWD Set 1 | GAG GCT ACT TGT TTC CAG AC    |
|                | jgi YarliW29_1 6368 REV Set 1 | TCC GAG TTG GTC ATT CCT       |
| 2              | jgi YarliW29_1 1601 FWD Set 1 | AGA ACC TCG AGT CCT CTT AC    |
|                | jgi YarliW29_1 1601 REV Set 1 | TCT GGG AGC CAT CAT AGT AG    |
| 3              | jgi YarliW29_1 1074 FWD Set 1 | GAA GGT CAA CGG CAA GAA       |
|                | jgi YarliW29_1 1074 REV Set 1 | CAG GTT GTG AGG AAG TTT GA    |
| 4              | jgi YarliW29_1 6827 FWD Set 1 | GGA CGC TAT CAA GAA CAA GAA   |
|                | jgi YarliW29_1 6827 REV Set 1 | CGG AGA AGA AGA TGG AGT AGA   |
| 5              | jgi YarliW29_1 5643 FWD Set 1 | GAT TCC CTT CTG TGA AGT CTA C |
|                | jgi YarliW29_1 5643 REV Set 1 | CAT AAC TGG CTC GTC CAT AC    |
| 6              | jgi YarliW29_1 1270 FWD Set 1 | TGG CTC TCG AGA CAT TGA       |
|                | jgi YarliW29_1 1270 REV Set 1 | AAG TTG GAG ACA CCG ATA GA    |
| 7              | jgi YarliW29_1 1973 FWD Set 1 | GTG GCA TTC TCA CCT CTT AC    |
|                | jgi YarliW29_1 1973 REV Set 1 | AGG GTG ACA GCA GAC TTA       |
| 8              | jgi YarliW29_1 5256 FWD Set 1 | CTC GGA TGT CCA CTA CTA TCT   |
|                | jgi YarliW29_1 5256 REV Set 1 | TGA CTT CAG GAC CAA CCT       |
| 9              | jgi YarliW29_1 3668 FWD Set 1 | GTC ACT GCC TAC TCT TCT TTC   |
|                | jgi YarliW29_1 3668 REV Set 1 | TGG TGA TGG TCT CGT TCT       |
| 10             | YAL11_F00616p FWD Set 1       | GAC TCT CTG CTC CTG TAT CT    |
|                | YAL11_F00616p REV Set 1       | CAG ACC GGT GAT TTC CAT AG    |
| 11             | YAL11_E06664p FWD Set 1       | CTG CCA TCA TCT ACG GAA AC    |
|                | YAL11_E06664p REV Set 1       | GAG CAG GGT AGG TAC AGA ATA   |
| 12             | YAL11_E07744p FWD Set 1       | GAT ACT CTC ACC AGC AGT TTG   |
|                | YAL11_E07744p REV Set 1       | CTG GCC CTT GTA GTA GTT AAT G |

|    |                         |                             |
|----|-------------------------|-----------------------------|
| 13 | YALI1_F20914p FWD Set 1 | AGC ACG GTA TCC ACT GTA     |
|    | YALI1_F20914p REV Set 1 | CCA ACA AAG GGA GAG ATG AG  |
| 14 | YALI1_E26811p FWD Set 1 | GGA ATC ATC CGA GAC GTT ATT |
|    | YALI1_E26811p REV Set 1 | GCA CCT TGA CCT TCT CAT C   |
| 15 | YALI1_B20462p FWD Set 1 | CAT CAT TGA CGG TGG TAA CT  |
|    | YALI1_B20462p REV Set 1 | CAC CGG AAC CAA CAA AGA     |
| 16 | Actin 142575p FWD Set 1 | AAG TCC AAC CGA GAG AAG A   |
|    | Actin 142575p REV Set 1 | CAC CAG AGT CAA GAA CGA TAC |
