# Supplementary material for: Metabolic engineering of the oleaginous yeast Yarrowia lipolytica PO1f for production of erythritol from glycerol
Source: PubMed Central journal article supplement (PMC8466642; doi:10.1186/s13068-021-02039-0), 2021-09-25
Supplement: 13068_2021_2039_MOESM12_ESM.pdf [file 13068_2021_2039_MOESM12_ESM.pdf]

**Additional File 12: Table S3.** A total of 68 intracellular metabolites such as amino acids, sugars, phosphates, fatty acids, organic acids, nucleosides and others, identified under glycerol without NaCl and glycerol with NaCl conditions by GC-MS analysis in *Y. lipolytica* Po1f.

| Sr. no. | Metabolite                  | relative concentration |        |           |        |
|---------|-----------------------------|------------------------|--------|-----------|--------|
|         |                             | Without NaCl           |        | With NaCl |        |
|         |                             | Average                | STDE   | Average   | STDE   |
| 1       | E-15-Heptadecenal           | 131.17                 | 19.10  | 73.18     | 5.07   |
| 2       | 1-Monohexadecanoylglycerol  | 16.00                  | 0.90   | 17.02     | 2.71   |
| 3       | 2-Isopropylmalic acid       | 212.36                 | 35.24  | 756.21    | 115.78 |
| 4       | GABA                        | 64.04                  | 1.29   | 46.59     | 6.61   |
| 5       | 4-Hydroxyproline            | 0.00                   | 0.00   | 5.08      | 0.23   |
| 6       | 5-Methylthioadenosine       | 0.00                   | 0.00   | 15.35     | 1.40   |
| 7       | C18:2 (9,12)                | 180.88                 | 0.87   | 148.37    | 0.27   |
| 8       | C16:1 (9)                   | 25.78                  | 6.34   | 33.79     | 0.54   |
| 9       | $\alpha$ -Ketoglutaric acid | 34.18                  | 13.16  | 61.78     | 4.60   |
| 10      | Alanine                     | 414.39                 | 144.79 | 260.89    | 33.55  |
| 11      | Aminomalonic acid           | 19.97                  | 8.11   | 0.00      | 0.00   |
| 12      | Arabitol                    | 99.13                  | 14.66  | 1063.13   | 207.15 |
| 13      | Arginine                    | 0.00                   | 0.00   | 2.17      | 0.60   |
| 14      | Aspartic acid               | 20.73                  | 3.89   | 62.60     | 16.37  |
| 15      | Benzoic acid                | 1043                   | 154.74 | 564.35    | 42.70  |
| 16      | C18:1 (11)                  | 21.86                  | 5.87   | 10.36     | 0.87   |
| 17      | C18:1 (9)                   | 174.45                 | 64.13  | 75.33     | 27.73  |

|    |                                  |          |         |          |         |
|----|----------------------------------|----------|---------|----------|---------|
| 18 | Cadaverine                       | 0.00     | 0.00    | 6.74     | 1.72    |
| 19 | Citric acid                      | 0.00     | 0.00    | 4.72     | 0.07    |
| 20 | Diethyleneglycol                 | 9.58     | 2.45    | 6.79     | 1.18    |
| 21 | Diglycerol                       | 0.00     | 0.00    | 4.81     | 1.86    |
| 22 | C22:0                            | 52.50    | 9.61    | 29.95    | 3.16    |
| 23 | Docosanol                        | 26.01    | 4.01    | 14.41    | 1.03    |
| 24 | C20:0                            | 20.96    | 2.72    | 10.89    | 0.99    |
| 25 | Ergosterol                       | 51.78    | 10.69   | 36.67    | 8.28    |
| 26 | Erythritol                       | 881.17   | 12.81   | 9629.94  | 2171.22 |
| 27 | Ethanolamine                     | 74.72    | 21.83   | 102.71   | 18.35   |
| 28 | Ethanolamine<br>glycerophosphate | 9.78     | 3.39    | 47.85    | 5.53    |
| 29 | Fructose                         | 49.03    | 6.67    | 77.34    | 9.15    |
| 30 | Fumaric acid                     | 5.00     | 0.75    | 7.57     | 1.37    |
| 31 | Glucose                          | 27.06    | 1.00    | 32.85    | 4.59    |
| 32 | Glutamic acid                    | 4.67     | 1.00    | 114.22   | 0.26    |
| 33 | Glutamine                        | 125.00   | 35.81   | 337.47   | 39.92   |
| 34 | Glycerol                         | 32286.63 | 4532.00 | 35414.65 | 7532.83 |
| 35 | Glycerol-3-p                     | 25.19    | 0.08    | 19.17    | 0.05    |
| 36 | Glycine                          | 55.85    | 4.80    | 109.14   | 18.31   |
| 37 | Glycolic acid                    | 22.07    | 5.07    | 14.65    | 3.07    |
| 38 | Glyoxylic acid                   | 32.11    | 2.56    | 15.45    | 0.75    |
| 39 | Inositol, myo                    | 20.58    | 3.36    | 66.34    | 6.79    |
| 40 | Isoleucine                       | 0.00     | 0.00    | 27.77    | 2.00    |
| 41 | lactic acid                      | 86.70    | 18.96   | 145.20   | 78.34   |
| 42 | Leucine                          | 1.28     | 0.00    | 2.79     | 0.39    |
| 43 | Lysine                           | 0.00     | 0.00    | 34.16    | 6.04    |
| 44 | Malic acid                       | 0.00     | 0.00    | 3.10     | 0.34    |

|    |                              |         |        |         |        |
|----|------------------------------|---------|--------|---------|--------|
| 45 | Mannitol                     | 1031.25 | 11.94  | 2683.60 | 352.35 |
| 46 | N- $\alpha$ -Acetyl-L-Lysine | 0.00    | 0.00   | 0.00    | 0.00   |
| 47 | N-Acetylglutamic acid        | 44.11   | 11.11  | 43.21   | 3.36   |
| 48 | Octadecane                   | 38.51   | 8.61   | 20.31   | 4.98   |
| 49 | Octadecanol                  | 35.02   | 7.30   | 17.86   | 2.26   |
| 50 | Palmitic acid                | 2463.83 | 583.81 | 1302.93 | 203.08 |
| 51 | Phenylalanine                | 3.35    | 0.29   | 10.72   | 3.18   |
| 52 | Proline                      | 6.93    | 1.99   | 36.97   | 3.52   |
| 53 | Putrescine                   | 19.94   | 13.21  | 51.76   | 15.85  |
| 54 | pyruvic acid                 | 122.07  | 13.65  | 166.47  | 41.68  |
| 55 | Ribitol                      | 6.38    | 0.39   | 49.13   | 10.46  |
| 56 | Ribose                       | 5.81    | 3.06   | 22.12   | 3.52   |
| 57 | Serine                       | 19.79   | 3.69   | 42.15   | 0.67   |
| 58 | sorbitol                     | 19.19   | 1.02   | 20.53   | 1.99   |
| 59 | Spermidine                   | 14.05   | 2.93   | 576.57  | 171.77 |
| 60 | Stearic acid                 | 2629.80 | 558.44 | 1600.21 | 210.43 |
| 61 | Succinic acid                | 37.96   | 6.63   | 45.19   | 7.02   |
| 62 | Tetradecanoic acid           | 47.02   | 8.49   | 27.86   | 2.83   |
| 63 | Threitol                     | 0.00    | 0.00   | 4.35    | 1.48   |
| 64 | Threonine                    | 53.66   | 11.07  | 85.25   | 2.80   |
| 65 | Trehalose                    | 39.83   | 1.97   | 11.30   | 1.07   |
| 66 | Tryptophan                   | 0.00    | 0.00   | 0.52    | 0.11   |
| 67 | Tyrosine                     | 0.00    | 0.00   | 9.68    | 0.84   |
| 68 | Valine                       | 20.07   | 4.62   | 26.15   | 0.69   |
