# Supplementary material for: Metabolic engineering of the oleaginous yeast Yarrowia lipolytica PO1f for production of erythritol from glycerol
Source: PubMed Central journal article supplement (PMC8466642; doi:10.1186/s13068-021-02039-0), 2021-09-25
Supplement: 13068_2021_2039_MOESM13_ESM.pdf [file 13068_2021_2039_MOESM13_ESM.pdf]

**Additional File 13: Table S4.** Nucleotide sequence of codon optimized sugar alcohol phosphatase.

| Name       | Sequence (5'-3')                                                                                                                                                                                                                                                                                                                                                                                                                                                                                                                                                                                                                                                                                                                                                                                                                                       |
|------------|--------------------------------------------------------------------------------------------------------------------------------------------------------------------------------------------------------------------------------------------------------------------------------------------------------------------------------------------------------------------------------------------------------------------------------------------------------------------------------------------------------------------------------------------------------------------------------------------------------------------------------------------------------------------------------------------------------------------------------------------------------------------------------------------------------------------------------------------------------|
| <i>PYP</i> | gaatcattcaaagcgccATGGTCAAGGCTGTGATCTTCACGGATTCGATG<br>GCACTGTCACTCTGGAGGACAGCAACGATTACCTTACAGATACTTG<br>GTTTTGGAAAAGAGAAACGGCTCAAGGTTTTCGAAGGCGTTCTGGATG<br>ACACCAAATCGTTCGGTCAAGGTTTCATGGAAATGCTTGAGTCGATTC<br>ATACACCTTTCCCTGAATGCATTAATAATTCTGGAGAAAAAGATTAGACT<br>TGATCCCGGCTTCAAAGATACATTTGAGTGGGCACAGGAAAATGATGT<br>CCCTGTTATTGTCGTTAGCTCTGGAATGAAACCCATTATCAAGGTCCTT<br>CTGACCCGACTTGTCGGTCAGGAATCCATCCATAAAATCGACATTGTT<br>TCGAACGAAGTGGAGATCGATGCACACGACCAGTGGAAAGATCATTTAC<br>AAAGACGAAAGCCCTTTTGGACACGATAAAAGCCGATCCATTGATGCT<br>TACAAAAAAAAGTTCGAATCGACGCTGAAGGCAGGCGAGCAGAGACC<br>TGTTTATTTTTACTGTGGAGATGGAGTCTCCGATCTCTCTGCAGCAAAA<br>GAATGTGATCTCCTGTTTCGCAAAGCGGGGCAAAGATCTGGTTACCTAT<br>TGCAAGAAGCAGAATGTCCCCTTCCATGAGTTTGACACGTTCAAGGAC<br>ATCCTGGCCTCGATGAAACAAGTGCTGGCTGGAGAAAAAACCGTTGCT<br>GAGCTTATGGAGAAGTAggctagcctcatgtaattag |
