# Supplementary material for: Metabolic engineering of the oleaginous yeast Yarrowia lipolytica PO1f for production of erythritol from glycerol
Source: PubMed Central journal article supplement (PMC8466642; doi:10.1186/s13068-021-02039-0), 2021-09-25
Supplement: 13068_2021_2039_MOESM15_ESM.pdf [file 13068_2021_2039_MOESM15_ESM.pdf]

**Additional File 15: Table S5.** Oligonucleotides used in this study.

| Primer                   | Sequence                                                       | Characteristic      |
|--------------------------|----------------------------------------------------------------|---------------------|
| Sjpyp co yl FP           | CAT TCA AAG GCG CGC CAT GGT CAA GGC TGT G                      | PYP PCR             |
| Sjpyp co yl RP           | CAT GAG GCT AGC CTA GTT CTC CAT AAG C                          | PYP PCR             |
| SjTKL yl FP              | gaatcattcaaaggcgcgccATG GCT CCC CAA TTT TCA AAG<br>ACT GAC G   | TKL PCR             |
| SjTKL yl RP              | CTA ATT ACA TGA GGC TAG CTT AGA CAC CGT GGC<br>CGG GTC         | TKL PCR             |
| SjGK yl FP               | gaatcattcaaaggcgcgccATG TCT TCC TAC GTA GGA GCT<br>CTC GAC     | GK PCR              |
| SjGK yl RP               | CTA ATT ACA TGA GGC TAG CCTG GTC GAG AGC TCC<br>TAC GTA GGA AG | GK PCR              |
| SJ Pyp1 YL M<br>FP       | CTG GAG GAC AGC AAC GAT TAC CTT ACA GAT AC                     | PYP middle<br>PCR   |
| SJ Pyp1 YL M<br>RP       | CAG GAT GTC CTT GAA CGT GTC AAA CTC ATG                        | PYP middle<br>PCR   |
| SJ GK YL FP              | gaatcattcaaa<br>AAGCTTATGTCTTCCTACGTAGGAGCTCTCGA               | GK middle<br>PCR    |
| SJ GK YL RP              | CTA ATT ACA TGA GGG CGC GCC TTA CTC AAG CCA<br>GCC AAC AGC TC  | GK middle<br>PCR    |
|                          |                                                                |                     |
| pCHPH FP                 | GCC ACG GTG TCT AAC TCG AGT CAT GTA ATT AGT TAT<br>GTC ACG     | pCHPH<br>Gibson PCR |
| pCHPH RP                 | GGA GCC ATG CTG CGG TTA GTA CTG C                              | pCHPH<br>Gibson PCR |
| TKL FP                   | gcagtactaaccgcagcATGGCTCCCCAATTTTCAAAGACTGAC                   | TKL Gibson<br>PCR   |
| TKL RP                   | ATG ACT CGA GTT AGA CAC CGT GGC CGG GTC                        | TKL Gibson<br>PCR   |
|                          |                                                                |                     |
| TKL check FP             | ATGGCTCCCCAATTTTCAAAGACTGAC                                    | TKL check<br>PCR    |
| TKL middle<br>check RP   | TCG TCG GAT GAT CTC AGA GTG CTC                                | TKL check<br>PCR    |
| TKL check RP             | TT AGA CAC CGT GGC CGG GTC                                     | TKL check<br>PCR    |
| GK YL check<br>FP        | ATGTCTTCCTACGTAGGAGCTCTCGA                                     | GK check<br>PCR     |
| GK YL middle<br>check RP | GCTC TCC AAT CTG CTC GGA AGA CTC                               | GK check<br>PCR     |
| GK YL check<br>RP        | GAGCTGTTGGCTGGCTTGAGTAA                                        | GK check<br>PCR     |
| USB16 middle<br>FP       | CTT CTC TTT GTG TGT AGT GTA CGT ACA TTA TC                     | PYP check<br>PCR    |

|                   |                                                      |         |       |
|-------------------|------------------------------------------------------|---------|-------|
| GK middle RP      | GAG GGT CTC AAT GTT CAT GAA CAT G                    | GK PCR  | check |
| TEFintr middle FP | GAA TCT ACG CTT GTT CAG ACT TTG TAC TAG              | TKL PCR | check |
| TKL middle RP     | TCA ATA GTC TTG GCG TAG AGA TCA G                    | TKL PCR | check |
|                   |                                                      |         |       |
| SJ GK YL FP M     | gaatcatAAGCTT ATGTCTTCCTACGTAGGAGCTCTCGA             | GK PCR  | check |
| SJ GK YL RP M     | T ACA TGA GGG CGC GCC TTA CTC AAG CCA GCC AAC AGC TC | GK PCR  | check |
